# Supplementary material
Source: publisher figshare collection journal article supplement (https://gsajournals.figshare.com/articles/dataset/_/8120933)
Supplement: Supplementary file 1 [file 1]

## Sheet: S1-Individual Characteristics
Table S1: Characteristics of METSIM individuals
Sample ID	Body Mass Index	Waist (cm)	Waist-to-hip ratio	Age (yrs)	Glucose Tolerance
Tissue 1	28.4055	106	1.02913	62	impaired
Tissue 2	23.9869	91.5	0.9433	51	normal
Tissue 3	24.8971	100	1.08696	55	normal

## Sheet: S2- TF enrichment
Table S2: Transcription factor motif enrichment
Motifs enriched in adipose tissue but not lymphoblasts
Sample	Motif ID	Transcription Factor	Consensus Motif	P value	Adj P Value	E Value	Number of Tests
AdiposeTissue	MA0102.3	CEBPA	ATTGCAYAAYH	0	0	0	21373
AdiposeTissue	MA0837.1	CEBPE	VTTRCGCAAY	0	0	0	18157
AdiposeTissue	MA0836.1	CEBPD	RTTRCGCAAY	0	0	0	11688
AdiposeTissue	MA0043.2	HLF	NVTTACRTAAYH	0	0	0	12834
AdiposeTissue	MA0466.2	CEBPB	RTTRCGCAAY	0	0	0	14061
AdiposeTissue	MA0624.1	NFATC1	WWTTTCCRHN	0	0	0	46067
AdiposeTissue	MA0639.1	DBP	NRTTACGTAAYV	0	0	0	5973
AdiposeTissue	MA0843.1	TEF	BRTTACRTAAYM	6.72e-260	3.15e-256	1.63e-253	4682
AdiposeTissue	MA0042.2	FOXI1	GTAAACA	8.04e-256	1.36e-251	7.07e-249	16941
AdiposeTissue	MA0838.1	CEBPG	ATTRCGCAAY	6.78e-252	4.13e-248	2.14e-245	6092
AdiposeTissue	MA0614.1	Foxj2	RTAAACAA	2.21e-236	5.12e-232	2.66e-229	23142
AdiposeTissue	MA0849.1	FOXO6	GTAAACA	1.12e-212	1.82e-208	9.43e-206	16284
AdiposeTissue	MA0030.1	FOXF2	BNAASGTAAACAAD	7.12e-200	5.18e-196	2.69e-193	7282
AdiposeTissue	MA0025.1	NFIL3	TTAYGTAAYNH	4.46e-199	2.69e-195	1.4e-192	6035
AdiposeTissue	MA0613.1	FOXG1	RTAAACAW	2.21e-197	1.55e-193	8.02e-191	7005
AdiposeTissue	MA0809.1	TEAD4	NRCATTCCWN	1.71e-195	5.67e-191	2.94e-188	33188
AdiposeTissue	MA0090.2	TEAD1	YRCATTCCWH	8.88e-186	2.83e-181	1.47e-178	31863
AdiposeTissue	MA0137.3	STAT1	TTTCYRGGAAA	2.74e-182	3.59e-178	1.86e-175	13101
AdiposeTissue	MA0833.1	ATF4	GKATGAYGCAATM	1.13e-175	7.13e-172	3.7e-169	6307
AdiposeTissue	MA0144.2	STAT3	YTTCYKGGAAD	4.22e-173	1.12e-168	5.8e-166	26517
AdiposeTissue	MA0604.1	Atf1	RTGACGTA	5.13e-172	3.19e-168	1.66e-165	6218
AdiposeTissue	MA0597.1	THAP1	YTGCCCDBA	2.86e-169	1.77e-164	9.21e-162	62039
AdiposeTissue	MA0007.3	Ar	RGGWACAYNGTGTWCYY	2.89e-167	6.99e-164	3.63e-161	2414
AdiposeTissue	MA0727.1	NR3C2	KRGWACAYWRTGTWCYH	1.21e-166	2.24e-163	1.16e-160	1850
AdiposeTissue	MA0878.1	CDX1	GYMATAAAA	2.15e-167	6.13e-163	3.18e-160	28487
AdiposeTissue	MA0519.1	Stat5a::Stat5b	DTTTCCMAGAA	2.91e-165	6.02e-161	3.12e-158	20715
AdiposeTissue	MA0609.1	Crem	NATGACGTMA	1.91e-161	7.24e-158	3.76e-155	3789
AdiposeTissue	MA0147.2	Myc	CCAYGTGSTY	3.21e-161	3.77e-157	1.96e-154	11735
AdiposeTissue	MA0113.3	NR3C1	DRGWACAYDRTGTWCYH	8.63e-157	1.56e-153	8.08e-151	1805
AdiposeTissue	MA0509.1	Rfx1	GTYNCCATGGCAAC	9.13e-155	8.56e-151	4.45e-148	9381
AdiposeTissue	MA0518.1	Stat4	YTTCYRGGAARNVR	2.63e-153	5.52e-149	2.86e-146	20966
AdiposeTissue	MA0819.1	CLOCK	AACACGTGTH	2.79e-144	2.38e-140	1.23e-137	8534
AdiposeTissue	MA0808.1	TEAD3	RCATTCCW	2.61e-139	5.43e-135	2.82e-132	20849
AdiposeTissue	MA0065.2	Pparg::Rxra	STRGGGCARAGGKCA	5.05e-136	1.91e-131	9.92e-129	37870
AdiposeTissue	MA0901.1	HOXB13	CCAATAAAAH	4.84e-130	9.69e-126	5.03e-123	20022
AdiposeTissue	MA0607.1	Bhlha15	SCATATGT	3.19e-128	6.24e-124	3.24e-121	19566
AdiposeTissue	MA0909.1	HOXD13	CYMATAAAAH	8e-127	1.58e-122	8.22e-120	19795
AdiposeTissue	MA0031.1	FOXD1	GTAAACAW	6.58e-116	1.29e-111	6.7e-109	19609
AdiposeTissue	MA0862.1	GMEB2	TTACGTAA	4.32e-113	1.59e-109	8.24e-107	3671
AdiposeTissue	MA0157.2	FOXO3	GTAAACAW	1.45e-112	1.83e-108	9.51e-106	12655
AdiposeTissue	MA0649.1	HEY2	GRCACGTGYC	3.52e-111	2.42e-107	1.25e-104	6859
Motifs enriched in lymphoblasts but not adipose tissue
Sample	Motif ID	Transcription Factor	Consensus Motif	P value	Adj P Value	E Value	Number of Tests
Lymphoblast	MA0051.1	IRF2	SGAAAGYGAAASCRWWWM	1.78E-314	7.72E-311	4.01e-308	4346
Lymphoblast	MA0507.1	POU2F2	YDNATTTGCATRT	4.88e-306	7.58e-302	3.93e-299	15518
Lymphoblast	MA0073.1	RREB1	CCCCMAAMCAMCCMCMMMCV	2.34e-302	1.66e-298	8.63e-296	7096
Lymphoblast	MA0522.2	TCF3	HRCACCTGBN	8.25e-285	2.93e-280	1.52e-277	35448
Lymphoblast	MA0684.1	RUNX3	WAACCRCAAA	1.12e-282	2.11e-278	1.1e-275	18892
Lymphoblast	MA0511.2	RUNX2	WAACCGCAA	4.58e-271	8.23e-267	4.27e-264	17943
Lymphoblast	MA0830.1	TCF4	HRCACCTGBN	3.72e-264	1.23e-259	6.37e-257	32987
Lymphoblast	MA0652.1	IRF8	HCGAAACCGAAACT	2.82e-260	4.73e-257	2.46e-254	1679
Lymphoblast	MA0785.1	POU2F1	AWTATGCWAATK	1.8e-261	4.93e-257	2.56e-254	27372
Lymphoblast	MA0784.1	POU1F1	AWTATGCWAATKAG	3.47e-259	6.33e-255	3.28e-252	18229
Lymphoblast	MA0788.1	POU3F3	WWTATGCWAATTW	6.41e-253	1.62e-248	8.39e-246	25198
Lymphoblast	MA0787.1	POU3F2	WTATGCWAATKA	9.26e-246	1.92e-241	9.98e-239	20755
Lymphoblast	MA0792.1	POU5F1B	TATGCWAAT	1.83e-230	5.97e-226	3.1e-223	32580
Lymphoblast	MA0653.1	IRF9	AACGAAACCGAAACT	1.39e-226	2e-223	1.04e-220	1437
Lymphoblast	MA0499.1	Myod1	NSCAGCTGYYNYB	6.7e-217	1.89e-212	9.8e-210	28181
Lymphoblast	MA0824.1	ID4	NRCACCTGBH	1.2e-202	3.43e-198	1.78e-195	28539
Lymphoblast	MA0789.1	POU3F4	TATGCWAAT	1.21e-195	2.11e-191	1.1e-188	17401
Lymphoblast	MA0048.2	NHLH1	CGCAGCTGCK	7.9e-195	1.64e-190	8.5e-188	20728
Lymphoblast	MA0627.1	Pou2f3	THKTATGCAAATKMDM	5.12e-194	7.33e-190	3.8e-187	14304
Lymphoblast	MA0521.1	Tcf12	RACAGCTGSNV	3.27e-176	8.65e-172	4.49e-169	26441
Lymphoblast	MA0514.1	Sox3	CCTTTGTYYY	2.67e-164	9.56e-160	4.96e-157	35872
Lymphoblast	MA0820.1	FIGLA	WMCACCTGKW	3.74e-159	1.31e-154	6.81e-152	35110
Lymphoblast	MA0791.1	POU4F3	RTGMATWATTAATGAR	1.02e-144	2.21e-140	1.15e-137	21743
Lymphoblast	MA0733.1	EGR4	NHMCGCCCACGCAHWT	2.34e-136	3.39e-132	1.76e-129	14467
Lymphoblast	MA0130.1	ZNF354C	MTCCAC	7.33e-123	3.46e-118	1.8e-115	47163
Lymphoblast	MA0501.1	MAF::NFE2	ATGACTCAGCANWTY	8.35e-116	5.99e-112	3.11e-109	7168
Lymphoblast	MA0014.2	PAX5	VDRRKCAGYSRAGCRTGAC	1.77e-113	2.63e-109	1.36e-106	14851
Lymphoblast	MA0732.1	EGR3	HHMCGCCCACGCAHH	2.17e-111	1.17e-107	6.06e-105	5376
Lymphoblast	MA0150.2	Nfe2l2	CASNATGACTCAGCA	2e-111	2.09e-107	1.08e-104	10435
Motifs enriched in adipose tissue and lymphoblasts
Sample	Motif ID	Transcription Factor	Consensus Motif	P value (adipose)	Adj P Value (adipose)	E Value (adipose)	Number of Tests (adipose)	P value (lymphoblast)	Adj P Value (lymphoblast)	E Value (lymphoblast)	Number of tests (lymphoblast)
AdiposeTissue&Lymphoblast	MA0002.2	RUNX1	BBYTGTGGTTT	2.02e-181	7.07e-177	3.67e-174	34935	0	0	0	42422
AdiposeTissue&Lymphoblast	MA0004.1	Arnt	CACGTG	1.68e-293	1.56e-289	8.07e-287	9265	5.11e-234	4.88e-230	2.53e-227	9542
AdiposeTissue&Lymphoblast	MA0018.2	CREB1	TGACGTCA	1.06e-158	1.57e-154	8.13e-152	14839	3.73e-118	5.41e-114	2.81e-111	14493
AdiposeTissue&Lymphoblast	MA0028.2	ELK1	ACCGGAAGTR	1.3e-157	8.18e-154	4.24e-151	6276	4.57e-116	3.11e-112	1.61e-109	6799
AdiposeTissue&Lymphoblast	MA0032.2	FOXC1	WAWGTAAAYAW	0	0	0	25963	0	0	0	33353
AdiposeTissue&Lymphoblast	MA0033.2	FOXL1	RTAAACA	0	0	0	23851	6.13e-246	1.84e-241	9.54e-239	30000
AdiposeTissue&Lymphoblast	MA0039.2	Klf4	DGGGYGKGGC	0	0	0	29284	0	0	0	31220
AdiposeTissue&Lymphoblast	MA0041.1	Foxd3	GWWTGTTTDTTT	0	0	0	26005	0	0	0	35317
AdiposeTissue&Lymphoblast	MA0047.2	Foxa2	TGTTTACWYWGB	2.47e-217	4.12e-213	2.14e-210	16701	2.78e-125	5.95e-121	3.09e-118	21383
AdiposeTissue&Lymphoblast	MA0050.2	IRF1	NTTYASTTTCACTTTCDBTTT	0	0	0	16742	0	0	0	28597
AdiposeTissue&Lymphoblast	MA0052.3	MEF2A	KCTAWAAATAGM	1.85e-271	9.54e-268	4.95e-265	5147	0	0	0	8502
AdiposeTissue&Lymphoblast	MA0058.3	MAX	AVCACGTGNY	5.85e-308	5.3e-304	2.75e-301	9063	1.02e-221	9.14e-218	4.74e-215	8972
AdiposeTissue&Lymphoblast	MA0059.1	MAX::MYC	RASCACGTGGT	1.79e-186	1.13e-182	5.89e-180	6327	2.2e-111	1.34e-107	6.94e-105	6071
AdiposeTissue&Lymphoblast	MA0062.2	Gabpa	CCGGAAGTGVV	1.33e-303	1.98e-299	1.03e-296	14918	0	0	0	16011
AdiposeTissue&Lymphoblast	MA0076.2	ELK4	BCRCTTCCGGB	0	0	0	20037	0	0	0	21242
AdiposeTissue&Lymphoblast	MA0079.3	SP1	GCCCCKCCCCC	0	0	0	37928	0	0	0	38577
AdiposeTissue&Lymphoblast	MA0080.4	SPI1	AAAAAGCGGAAGTW	6.76e-108	1.59e-104	8.24e-102	2347	0	0	0	4634
AdiposeTissue&Lymphoblast	MA0081.1	SPIB	WGMGGAA	0	0	0	50973	0	0	0	55214
AdiposeTissue&Lymphoblast	MA0093.2	USF1	VYCAYGTGACC	4.64e-238	5.37e-234	2.79e-231	11587	8.28e-158	1.02e-153	5.29e-151	12304
AdiposeTissue&Lymphoblast	MA0095.2	YY1	CAARATGGCBGC	3.91e-130	4.64e-126	2.41e-123	11844	1.43e-141	2.09e-137	1.09e-134	14612
AdiposeTissue&Lymphoblast	MA0098.3	ETS1	ACCGGAARTR	0	0	0	15610	0	0	0	16330
AdiposeTissue&Lymphoblast	MA0099.2	FOS::JUN	TGACTCA	7.18e-139	2.69e-134	1.4e-131	37477	8.61e-219	3.75e-214	1.95e-211	43574
AdiposeTissue&Lymphoblast	MA0104.3	Mycn	RCCACGTG	3.07e-231	3.16e-227	1.64e-224	10319	4.37e-189	4.78e-185	2.48e-182	10946
AdiposeTissue&Lymphoblast	MA0108.2	TBP	STATAAAWRSVVVBN	7.25e-195	1.47e-190	7.63e-188	20279	7.25e-238	1.78e-233	9.25e-231	24580
AdiposeTissue&Lymphoblast	MA0136.2	ELF5	AMSMGGAAGTD	0	0	0	32619	0	0	0	34829
AdiposeTissue&Lymphoblast	MA0139.1	CTCF	YGRCCASYAGRKGGCRSYR	0	0	0	14462	0	0	0	18636
AdiposeTissue&Lymphoblast	MA0146.2	Zfx	SSSGCCBVGGCCTS	1.35e-151	3.67e-147	1.91e-144	27235	1.15e-186	3.24e-182	1.68e-179	28066
AdiposeTissue&Lymphoblast	MA0148.3	FOXA1	YNBNTGTTTACWYWD	7.94e-196	1.24e-191	6.41e-189	15558	5.36e-142	1.13e-137	5.87e-135	21077
AdiposeTissue&Lymphoblast	MA0152.1	NFATC2	TTTTCCA	0	0	0	49119	1.69e-139	8.5e-135	4.41e-132	50334
AdiposeTissue&Lymphoblast	MA0156.2	FEV	ACCGGAAGTN	0	0	0	13393	6.43e-302	8.65e-298	4.49e-295	13452
AdiposeTissue&Lymphoblast	MA0162.2	EGR1	SCCCCGCCCCCGCM	0	0	0	27897	0	0	0	29555
AdiposeTissue&Lymphoblast	MA0259.1	ARNT::HIF1A	VBACGTGC	1.28e-174	1.56e-170	8.08e-168	12194	8.58e-130	1.02e-125	5.27e-123	11841
AdiposeTissue&Lymphoblast	MA0462.1	BATF::JUN	RRWATGASTCA	2.85e-150	4.08e-146	2.12e-143	14304	0	0	0	20167
AdiposeTissue&Lymphoblast	MA0464.2	BHLHE40	VKCACGTGMC	7.45e-170	3.03e-166	1.57e-163	4074	1.76e-111	7.63e-108	3.96e-105	4325
AdiposeTissue&Lymphoblast	MA0470.1	E2F4	GGGCGGGAARN	6.27e-118	9.95e-114	5.17e-111	15868	1.18e-149	2.02e-145	1.05e-142	17151
AdiposeTissue&Lymphoblast	MA0471.1	E2F6	RGGCGGGARRV	1.44e-297	3.61e-293	1.87e-290	25049	0	1.77863632502849e-322	9.36007366046242e-320	27752
AdiposeTissue&Lymphoblast	MA0473.2	ELF1	AACCCGGAAGTR	4.25e-242	2.27e-238	1.18e-235	5334	7.56e-245	4.49e-241	2.33e-238	5940
AdiposeTissue&Lymphoblast	MA0474.2	ERG	ACCGGAARTV	0	0	0	15699	0	0	0	16145
AdiposeTissue&Lymphoblast	MA0475.2	FLI1	ACCGGAARTR	0	0	0	10148	9.76e-305	1.06e-300	5.52e-298	10905
AdiposeTissue&Lymphoblast	MA0476.1	FOS	DVTGASTCATB	2.87e-263	3.48e-259	1.81e-256	12131	0	0	0	16981
AdiposeTissue&Lymphoblast	MA0477.1	FOSL1	RRTGASTCAKV	1.01e-289	1.01e-285	5.25e-283	10022	0	0	0	13380
AdiposeTissue&Lymphoblast	MA0478.1	FOSL2	KRRTGASTCAB	7.28e-281	7.73e-277	4.01e-274	10620	0	0	0	13406
AdiposeTissue&Lymphoblast	MA0480.1	Foxo1	TSYTGTTTACH	0	0	0	23013	1.21e-190	3.37e-186	1.75e-183	27922
AdiposeTissue&Lymphoblast	MA0481.1	FOXP1	MWAADGTAAACAAAR	0	0	0	26240	0	0	0	35381
AdiposeTissue&Lymphoblast	MA0488.1	JUN	DDRATGATGTCAT	0	2.73218302150209e-321	1.41999901336879e-318	8665	1.29e-128	1.16e-124	6.02e-122	8979
AdiposeTissue&Lymphoblast	MA0489.1	JUN(var.2)	RRRRRRTGASTCAT	6.36e-260	7.94e-256	4.12e-253	12493	0	0	0	16949
AdiposeTissue&Lymphoblast	MA0490.1	JUNB	NRRTGASTCAK	3.58e-270	3.95e-266	2.05e-263	11054	0	0	0	15735
AdiposeTissue&Lymphoblast	MA0491.1	JUND	DRTGASTCATS	6.2e-284	5.08e-280	2.64e-277	8205	0	0	0	11531
AdiposeTissue&Lymphoblast	MA0492.1	JUND(var.2)	DDDRATGABGTCATN	1.28e-232	9.8e-229	5.09e-226	7668	2.21e-131	1.93e-127	1e-124	8730
AdiposeTissue&Lymphoblast	MA0493.1	Klf1	RRCCACACCCW	0	0	0	21675	0	0	0	24257
AdiposeTissue&Lymphoblast	MA0497.1	MEF2C	DDDCYAAAAATAGMW	0	0	0	21417	0	0	0	29019
AdiposeTissue&Lymphoblast	MA0500.1	Myog	RRCAGCTGSNV	3e-110	6.89e-106	3.58e-103	22943	3.67e-181	1.01e-176	5.26e-174	27595
AdiposeTissue&Lymphoblast	MA0506.1	NRF1	GCGCVTGCGCR	1.73e-284	2.23e-280	1.16e-277	12899	1.82e-278	2.56e-274	1.33e-271	14103
AdiposeTissue&Lymphoblast	MA0508.1	PRDM1	DRAAAGTGAAAGTGA	1.17e-265	2.86e-261	1.48e-258	24359	0	0	0	32716
AdiposeTissue&Lymphoblast	MA0510.2	RFX5	SGTTGCCATGGYAACV	2.97e-152	6.16e-149	3.2e-146	2074	3.19e-111	7.03e-108	3.65e-105	2202
AdiposeTissue&Lymphoblast	MA0516.1	SP2	GYCCCGCCYCYBSSS	0	0	0	34674	0	0	0	34586
AdiposeTissue&Lymphoblast	MA0517.1	STAT1::STAT2	THAGTTTCRKTTTCY	0	0	0	15975	0	0	0	25669
AdiposeTissue&Lymphoblast	MA0526.1	USF2	RYCAYGTGACY	6.87e-202	8.47e-198	4.39e-195	12315	2.88e-161	4.07e-157	2.11e-154	14116
AdiposeTissue&Lymphoblast	MA0528.1	ZNF263	GGAGGAGGRRGRGGRGGRRGR	0	0	0	35881	0	0	0	41712
AdiposeTissue&Lymphoblast	MA0593.1	FOXP2	RWGTAAACAVR	0	0	0	16628	4.45e-299	9.56e-295	4.96e-292	21506
AdiposeTissue&Lymphoblast	MA0598.2	EHF	WACCCGGAAGTA	6.51e-291	5.61e-287	2.91e-284	8622	0	0	0	9585
AdiposeTissue&Lymphoblast	MA0599.1	KLF5	GCCCCDCCCH	0	0	0	37455	0	0	0	38381
AdiposeTissue&Lymphoblast	MA0600.2	RFX2	SGTTGCCATGGYAACS	3.41e-180	5.65e-177	2.93e-174	1658	3.74e-116	6.76e-113	3.51e-110	1808
AdiposeTissue&Lymphoblast	MA0601.1	Arid3b	ATATTAATWAN	7.05e-250	1.96e-245	1.02e-242	27794	3.24e-260	1.23e-255	6.38e-253	37891
AdiposeTissue&Lymphoblast	MA0602.1	Arid5a	SYAATATTGVDANH	4.74e-110	1.19e-105	6.17e-103	25062	2.13e-129	6.67e-125	3.46e-122	31370
AdiposeTissue&Lymphoblast	MA0603.1	Arntl	NGTCACGTGH	3.46e-261	2.93e-257	1.52e-254	8485	3.42e-141	2.6e-137	1.35e-134	7613
AdiposeTissue&Lymphoblast	MA0606.1	NFAT5	NTTTTCCAYN	0	0	0	46259	1.62e-260	8.24e-256	4.28e-253	50823
AdiposeTissue&Lymphoblast	MA0608.1	Creb3l2	GCCACGTGD	1.61e-167	8.23e-164	4.27e-161	5118	2.39e-139	1.36e-135	7.08e-133	5694
AdiposeTissue&Lymphoblast	MA0617.1	Id2	RCACGTGR	5.93e-289	4.14e-285	2.15e-282	6986	1.04e-225	8.57e-222	4.45e-219	8273
AdiposeTissue&Lymphoblast	MA0620.1	Mitf	NRTCACGWGN	6.11e-212	1.11e-207	5.78e-205	18212	6.82e-144	1.19e-139	6.18e-137	17458
AdiposeTissue&Lymphoblast	MA0622.1	Mlxip	BCACGTGK	1.62e-294	1.14e-290	5.89e-288	7004	4.39e-231	3.65e-227	1.9e-224	8329
AdiposeTissue&Lymphoblast	MA0625.1	NFATC3	WTTTTCCRYH	0	0	0	42054	4.72e-109	2.04e-104	1.06e-101	43121
AdiposeTissue&Lymphoblast	MA0626.1	Npas2	NSCACGTGTN	1.66e-198	1.87e-194	9.7e-192	11239	2.83e-144	3.06e-140	1.59e-137	10823
AdiposeTissue&Lymphoblast	MA0640.1	ELF3	WACCCGGAAGTAR	1.64e-178	7.04e-175	3.65e-172	4293	3.8e-262	1.91e-258	9.94e-256	5036
AdiposeTissue&Lymphoblast	MA0641.1	ELF4	AACCCGGAAGTR	2.63e-254	1.47e-250	7.65e-248	5604	0	4.44e-305	2.3e-302	6468
AdiposeTissue&Lymphoblast	MA0645.1	ETV6	MSCGGAAGTR	0	0	0	19834	0	0	0	22514
AdiposeTissue&Lymphoblast	MA0655.1	JDP2	ATGACTCAT	6.55e-176	4.39e-172	2.28e-169	6701	0	0	4.94065645841247e-324	9271
AdiposeTissue&Lymphoblast	MA0656.1	JDP2(var.2)	GATGACGTCAYC	5.21e-195	9.75e-192	5.06e-189	1871	2.85e-133	4.96e-130	2.57e-127	1741
AdiposeTissue&Lymphoblast	MA0660.1	MEF2B	RCTAWAAATAGC	2.01e-183	4.98e-180	2.58e-177	2477	5.06e-281	2.13e-277	1.1e-274	4202
AdiposeTissue&Lymphoblast	MA0663.1	MLX	RTCACGTGAT	1.05e-149	2.85e-146	1.48e-143	2708	3.73e-116	1e-112	5.2e-110	2689
AdiposeTissue&Lymphoblast	MA0664.1	MLXIPL	RTCACGTGAT	2.45e-184	1.37e-180	7.13e-178	5614	1.98e-142	1.09e-138	5.66e-136	5515
AdiposeTissue&Lymphoblast	MA0685.1	SP4	BWRGCCACGCCCMCTYH	0	0	0	5574	0	0	0	6138
AdiposeTissue&Lymphoblast	MA0687.1	SPIC	HAAAAGVGGAAGTA	1.56e-303	3e-299	1.56e-296	19224	0	0	0	24598
AdiposeTissue&Lymphoblast	MA0692.1	TFEB	RYCACGTGAC	1.12e-262	1.44e-258	7.47e-256	12818	5.79e-141	7.42e-137	3.85e-134	12819
AdiposeTissue&Lymphoblast	MA0703.1	LMX1B	NYAATTAA	1.85e-131	7.39e-127	3.84e-124	40016	8.29e-117	4.01e-112	2.08e-109	48330
AdiposeTissue&Lymphoblast	MA0740.1	KLF14	KRCCACGCCCMCYT	0	0	0	9843	2.35e-310	2.65e-306	1.38e-303	11277
AdiposeTissue&Lymphoblast	MA0741.1	KLF16	GMCACGCCCCC	0	0	0	27267	0	0	0	29505
AdiposeTissue&Lymphoblast	MA0742.1	Klf12	GRCCACGCCCWHHWH	3.34e-228	2.28e-224	1.18e-221	6837	6.43e-224	4.94e-220	2.56e-217	7687
AdiposeTissue&Lymphoblast	MA0746.1	SP3	VCCACGCCCMC	0	0	0	37169	0	0	0	39247
AdiposeTissue&Lymphoblast	MA0747.1	SP8	RCCACGCCCMCY	8.04e-291	2.26e-286	1.17e-283	28124	0	7.36157812303457e-322	3.82001676051535e-319	31302
AdiposeTissue&Lymphoblast	MA0759.1	ELK3	ACCGGAAGTD	1.23e-264	1.44e-260	7.5e-258	11721	8.1e-200	9.55e-196	4.95e-193	11793
AdiposeTissue&Lymphoblast	MA0760.1	ERF	ACCGGAAGTR	0	0	0	10948	0	0	0	11964
AdiposeTissue&Lymphoblast	MA0761.1	ETV1	ACCGGAAGTD	1.47999834539975e-318	2.03999999976822e-314	1.05999999999976e-311	13782	5.21e-226	7.1e-222	3.68e-219	13615
AdiposeTissue&Lymphoblast	MA0762.1	ETV2	AACCGGAAATR	0	0	0	8070	0	0	0	9166
AdiposeTissue&Lymphoblast	MA0763.1	ETV3	ACCGGAAGTR	3.13e-188	3.7e-184	1.92e-181	11811	1.09e-155	1.33e-151	6.91e-149	12247
AdiposeTissue&Lymphoblast	MA0764.1	ETV4	ACCGGAAGTR	0	0	0	15842	2.51e-288	3.85e-284	2e-281	15325
AdiposeTissue&Lymphoblast	MA0765.1	ETV5	ACCGGAWGYN	3.01e-247	4.83e-243	2.51e-240	16065	4.93e-139	7.56e-135	3.92e-132	15332
AdiposeTissue&Lymphoblast	MA0772.1	IRF7	HCGAAARYGAAAVT	1.67e-110	1.15e-106	5.98e-104	6914	0	0	0	11606
AdiposeTissue&Lymphoblast	MA0773.1	MEF2D	DCTAWAAATAGM	2.79e-209	7.64e-206	3.97e-203	2743	5.68e-307	2.4e-303	1.25e-300	4233
AdiposeTissue&Lymphoblast	MA0786.1	POU3F1	WTATGCWAATKW	1.84e-118	4e-114	2.08e-111	21728	1.21e-303	3.65e-299	1.89e-296	30272
AdiposeTissue&Lymphoblast	MA0790.1	POU4F1	ATGMATAATTAATG	2.61e-114	4.7e-110	2.44e-107	17991	4.48e-166	1.1e-161	5.69e-159	24478
AdiposeTissue&Lymphoblast	MA0798.1	RFX3	BGTTRCCATGGYAACS	2.16e-187	8.5e-184	4.41e-181	3939	4.17e-122	1.78e-118	9.24e-116	4271
AdiposeTissue&Lymphoblast	MA0799.1	RFX4	NGTWRCCATGGYWACS	3.28e-185	1.6e-181	8.32e-179	4882	3.02e-118	1.63e-114	8.46e-112	5390
AdiposeTissue&Lymphoblast	MA0816.1	Ascl2	ARCAGCTGCY	6.03e-120	1.37e-115	7.12e-113	22734	2.91e-206	7.11e-202	3.69e-199	24446
AdiposeTissue&Lymphoblast	MA0823.1	HEY1	GRCACGTGCC	6.09e-174	4.18e-170	2.17e-167	6862	1.25e-140	9.18e-137	4.77e-134	7369
AdiposeTissue&Lymphoblast	MA0825.1	MNT	RVCACGTGMH	6.16e-291	4.61e-287	2.39e-284	7482	1.61e-221	1.29e-217	6.71e-215	8045
AdiposeTissue&Lymphoblast	MA0831.1	TFE3	VYCACGTGAY	3.21e-262	4.79e-258	2.48e-255	14897	1.7e-158	2.45e-154	1.27e-151	14383
AdiposeTissue&Lymphoblast	MA0834.1	ATF7	NDATGACGTCATMV	5.84e-170	9.1e-167	4.72e-164	1558	1.16e-115	1.57e-112	8.13e-110	1354
AdiposeTissue&Lymphoblast	MA0840.1	Creb5	NATGACGTCAYH	1.79e-248	4.7e-245	2.44e-242	2624	4.13e-136	1.06e-132	5.51e-130	2570
AdiposeTissue&Lymphoblast	MA0841.1	NFE2	VATGACTCATS	7.2e-141	1.63e-137	8.47e-135	2268	1.97e-229	6.8e-226	3.53e-223	3451
AdiposeTissue&Lymphoblast	MA0845.1	FOXB1	WATGTAAATAT	4.79e-308	9.68e-304	5.02e-301	20197	1.61000000000114e-312	4.38e-308	2.28e-305	27181
AdiposeTissue&Lymphoblast	MA0846.1	FOXC2	WAWGTAAACAWW	0	0	0	29530	0	0	0	37715
AdiposeTissue&Lymphoblast	MA0847.1	FOXD2	GTAAACA	0	0	0	37399	1.14e-269	4.89e-265	2.54e-262	42902
AdiposeTissue&Lymphoblast	MA0848.1	FOXO4	GTAAACA	0	0	0	25071	5.35e-142	1.59e-137	8.23e-135	29642
AdiposeTissue&Lymphoblast	MA0850.1	FOXP3	RTAAACA	0	6.58e-304	3.42e-301	36495	1.04e-181	4.42e-177	2.29e-174	42300
AdiposeTissue&Lymphoblast	MA0851.1	Foxj3	NDAADGTAAACAAANNM	0	4.94065645841247e-323	2.5597541111035e-320	17817	4.29e-260	1.01e-255	5.25e-253	23599
AdiposeTissue&Lymphoblast	MA0852.1	Foxk1	NRAATGTAAACAAAVNB	3.09e-278	3.85e-274	2e-271	12440	7.24e-254	1.25e-249	6.46e-247	17213
AdiposeTissue&Lymphoblast	MA0871.1	TFEC	RTCACRTGAB	5.43e-184	8.84e-180	4.59e-177	16282	1.26e-112	2.18e-108	1.13e-105	17299
AdiposeTissue&Lymphoblast	MA0899.1	HOXA10	DGYMATAAAAH	1.23e-192	4.13e-188	2.14e-185	33614	1.39e-142	5.76e-138	2.99e-135	41329
AdiposeTissue&Lymphoblast	MA0910.1	Hoxd8	TAADTAATTAATRGCTN	2.18e-174	4.17e-170	2.17e-167	19121	1.73e-156	4.51e-152	2.34e-149	26152
AdiposeTissue&Lymphoblast	MA0913.1	Hoxd9	GYAATWAAAW	1.58e-217	5.65e-213	2.93e-210	35800	6.72e-211	2.97e-206	1.54e-203	44184

## Sheet: S3-Chromatin state overlap
Table S3: Overlap of ATAC peaks with adipose nuclei chromatin states and rank among 98 tissue and cell types
	Adipose Tissue		SGBS adipocytes		SGBS preadipocytes		Tissue-derived adipocytes		ENCODE adipose Tissue		GM12878 lymphoblasts
Chromatin State	Percent covered bases in adipose nuclei	Adipose rank among all 98 Tissues	Percent covered bases in adipose nuclei	Adipose rank among all 98 Tissues	Percent covered bases in adipose nuclei	Adipose rank among all 98 Tissues	Percent covered bases in adipose nuclei	Adipose rank among all 98 Tissues	Percent covered bases in adipose nuclei	Adipose rank among all 98 Tissues	Percent covered bases in adipose nuclei	Adipose rank among all 98 Tissues
Promoter+Enhancer	89.03	1	78.7	6	68.123	17	72.4	1	81.85	4	55.376	15
Promoter	49.21	4	46.04	8	42.267	11	39.41	7	57.01	9	42.32	11
Enhancer	39.82	1	32.66	4	25.856	24	32.99	1	24.84	18	13.056	32
Transcribed	2.74	98	5.89	93	8.759	79	5.08	98	5.47	91	9.937	44
Polycomb	1.58	92	3.81	73	4.976	48	5.23	65	4.21	61	6.388	40
Heterochromatin	0.2	93	0.3	71	0.603	54	3.53	41	0.26	67	1.21	40
ZNF repeat	0.18	57	0.13	44	0.194	30	2.2	37	0.11	57	0.296	32
Quiescent	6.27	98	11.16	91	17.346	79	11.55	96	8.1	90	26.792	74
Percent coverage was determined by the percent of the top 50,000 representative ATAC-seq peak bases overlapped by each chromatin state. Roadmap 18-state chromatin states included in the above categories (21): Promoter: 1_TssA, 2_TssFlnk, 3_TssFlnkU, 4_TssFlnkD, 14_TssBiv Enhancer: 7_EnhG1, 8_EnhG2, 9_EnhA1, 10_EnhA2, 11_EnhWk, 15_EnhBiv Transcribed: 5_Tx, 6_TxWk Polycomb repressed: 16_ReprPC, 17_…

## Sheet: S4 - peak overlap
Table S4: Percent ATAC-seq peak bases in various genomic categories
Condition	Promoter	Intragenic	Downstream	Distal
METSIM adipose Tissue	44.2306	30.6858	2.91749	22.1661
SGBS preadipocytes	40.9031	34.7646	3.00362	21.3287
SGBS adipocytes	42.8715	33.4723	3.15911	20.4971
ENCODE adipose Tissue	52.7007	28.1613	2.87611	16.2619
Tissue-derived adipocytes	37.7908	32.8383	3.05253	26.3184
GM12878 lymphoblasts	41.6426	32.3322	2.78846	23.2368
Promoter: 5kb upstream to 1kb downstream of any GENCODE TSS
Intragenic: Overlapping any GENCODE transcript downstream of the promoter
Downstream: within 5kb downstream of any GENCODE TTS
distal: >5kb from any GENCODE transcript
TSS: transcription start site
TTS: transcription termination site
GENCODE Basic set V24 lift37
Top 50,000 representative ATAC-seq peaks used for analysis

## Sheet: S5-GWAS traits and loci
Table S5: GWAS loci used in GREGOR enrichment analyses
Trait category	Number of loci	Number of variants	Traits included
Waist-hip ratio adj BMI	57	1309	Waist to hip ratio adjusted for BMI
Body mass index	84	3125	Body mass index
Type 2 diabetes	87	2496	Type 2 diabetes
Insulin traits	18	499	Fasting insulin, fasting insulin adjusted for BMI
Glucose traits	41	971	1 hour glucose, 2 hour glucose, 2 hour glucose adjusted for BMI, fasting glucose, fasting glucose adjusted for BMI
Triglycerides	70	3425	Triglycerides
HDL cholesterol	132	3289	HDL cholesterol, HDL cholesterol:triglycerides
LDL cholesterol	174	3272	LDL cholesterol
Total cholesterol	151	2265	Total cholesterol
Cardiovascular outcomes	61	1925	Coronary artery disease, coronary heart disease, large artery atherosclerosis, myocardial infarction, stroke
Blood pressure traits	43	1998	Diastolic blood pressure, hypertension, mean arterial pressure, pulse pressure, systolic blood pressure
GWAS loci are from the GWAS catalog (www.ebi.ac.uk/gwas, accessed December 2016)
Variants r2>0.8 with GWAS variant reported in the GWAS catalog from 1000 Genomes EUR Phase I

## Sheet: S6-GWAS enrichment
Table S6: Enrichment of GWAS loci in ATAC-seq peaks using GREGOR
Trait	Sample	Overlaps	Expected overlaps	Standard Deviation	Fold change	Z score	P value	Total loci in trait category
Waist-hip ratio adj BMI	AdiposeTissue_peaks	24	5.67	2.12	4.23	8.66	5.76e-12	57
BMI	AdiposeTissue_peaks	18	12.32	2.91	1.46	1.95	0.0414	84
Type 2 diabetes	AdiposeTissue_peaks	20	11.23	2.76	1.78	3.18	0.00258	87
Insulin	AdiposeTissue_peaks	9	2.63	1.39	3.43	4.58	0.000115	18
Glucose	AdiposeTissue_peaks	12	5.21	1.99	2.3	3.42	0.00196	41
Triglycerides	AdiposeTissue_peaks	21	10.53	2.7	2	3.88	0.000303	132
HDL cholesterol	AdiposeTissue_peaks	29	15.76	3.43	1.84	3.87	0.000273	174
LDL cholesterol	AdiposeTissue_peaks	24	15.71	3.52	1.53	2.35	0.0172	151
Total cholesterol	AdiposeTissue_peaks	23	15.28	3.4	1.51	2.27	0.0207	70
Cardiovascular outcomes	AdiposeTissue_peaks	20	9.04	2.45	2.21	4.47	5.24e-05	61
Blood pressure traits	AdiposeTissue_peaks	17	6.05	2.1	2.81	5.21	6.13e-06	43
Waist-hip ratio adj BMI	Adipocyte_Peaks	21	9.25	2.59	2.27	4.53	3.93e-05	57
BMI	Adipocyte_Peaks	21	17.66	3.32	1.19	1	0.194	84
Type 2 diabetes	Adipocyte_Peaks	24	16.75	3.28	1.43	2.21	0.0228	87
Insulin	Adipocyte_Peaks	5	3.97	1.62	1.26	0.64	0.358	18
Glucose	Adipocyte_Peaks	13	7.8	2.31	1.67	2.25	0.0251	41
Triglycerides	Adipocyte_Peaks	25	15.19	3.11	1.65	3.15	0.00206	132
HDL cholesterol	Adipocyte_Peaks	41	23.96	4.03	1.71	4.23	5.34e-05	174
LDL cholesterol	Adipocyte_Peaks	39	25.25	4.26	1.54	3.23	0.00153	151
Total cholesterol	Adipocyte_Peaks	37	24.16	4.05	1.53	3.17	0.00186	70
Cardiovascular outcomes	Adipocyte_Peaks	23	12.39	2.82	1.86	3.77	0.000381	61
Blood pressure traits	Adipocyte_Peaks	18	8.99	2.42	2	3.72	0.000488	43
Waist-hip ratio adj BMI	Preadipocyte_Peaks	19	9.18	2.55	2.07	3.86	0.000375	57
BMI	Preadipocyte_Peaks	18	17.11	3.27	1.05	0.27	0.445	84
Type 2 diabetes	Preadipocyte_Peaks	25	16.38	3.24	1.53	2.66	0.00793	87
Insulin	Preadipocyte_Peaks	6	3.87	1.6	1.55	1.34	0.151	18
Glucose	Preadipocyte_Peaks	12	8.09	2.3	1.48	1.7	0.0724	41
Triglycerides	Preadipocyte_Peaks	22	14.72	3.06	1.49	2.37	0.0159	132
HDL cholesterol	Preadipocyte_Peaks	36	23.61	3.99	1.52	3.11	0.00212	174
LDL cholesterol	Preadipocyte_Peaks	30	24.34	4.2	1.23	1.35	0.111	151
Total cholesterol	Preadipocyte_Peaks	34	22.89	3.99	1.49	2.79	0.00532	70
Cardiovascular outcomes	Preadipocyte_Peaks	24	12.61	2.76	1.9	4.12	0.000118	61
Blood pressure traits	Preadipocyte_Peaks	19	8.7	2.4	2.19	4.29	7.82e-05	43
Waist-hip ratio adj BMI	GM12878_Lymphoblast_Peaks	12	7.93	2.42	1.51	1.68	0.0744	57
BMI	GM12878_Lymphoblast_Peaks	19	15.55	3.12	1.22	1.1	0.171	84
Type 2 diabetes	GM12878_Lymphoblast_Peaks	20	14.43	3.02	1.39	1.84	0.0504	87
Insulin	GM12878_Lymphoblast_Peaks	4	3.25	1.51	1.23	0.5	0.414	18
Glucose	GM12878_Lymphoblast_Peaks	10	6.77	2.15	1.48	1.5	0.105	41
Triglycerides	GM12878_Lymphoblast_Peaks	16	13.15	2.94	1.22	0.97	0.208	132
HDL cholesterol	GM12878_Lymphoblast_Peaks	29	20.69	3.79	1.4	2.19	0.0227	174
LDL cholesterol	GM12878_Lymphoblast_Peaks	24	21.3	3.89	1.13	0.69	0.28	151
Total cholesterol	GM12878_Lymphoblast_Peaks	25	20.32	3.75	1.23	1.25	0.133	70
Cardiovascular outcomes	GM12878_Lymphoblast_Peaks	15	11.06	2.63	1.36	1.5	0.0978	61
Blood pressure traits	GM12878_Lymphoblast_Peaks	14	7.81	2.3	1.79	2.69	0.00921	43

## Sheet: S7-GWAS-eQTL-ATAC variants
Table S7: Variants at GWAS-eQTL colocalized loci that overlap ATAC-seq peaks
GWAS Trait	GWAS locus	GWAS index	eQTL Gene(s)	eSNP(s)	ATAC variant	MAF	r2 with GWAS	Total LD proxies at locus	ATAC Tissue samples	Transcription factor motifs overlapping Tissue peaks	Tissue Footprints	ATAC SGBS
Phospholipid	ABHD3	rs11662721	ESCO1	rs8086339	rs11662724	0.224978	0.944892	67	Tissue 1,Tissue 2,Tissue 3	EGR3,EGR4,PAX5,PAX9,TFAP2A(var.3),TFAP2B(var.3),TFAP2C(var.3)		Adipocytes,Preadipocytes
Metabolic traits	ACADM	rs211718	ACADM	rs12094842	rs1251075	0.294862	0.885642	142	Tissue 1,Tissue 2,Tissue 3	KLF14,NFIC::TLX1,PAX5,SP8,TFAP2A(var.2),TFAP2B,TFAP2C		Adipocytes,Preadipocytes
Metabolic traits	ACADM	rs211718	ACADM	rs12094842	rs61797339	0.27165	0.990489	142	Tissue 1,Tissue 2,Tissue 3	NR2F1,NR4A2,Nr2e1,Pparg::Rxra,Sox3		Adipocytes,Preadipocytes
WHRadjBMI	ADAMTS9	rs2371767	ADAMTS9	rs4616635	rs66815886	0.220811	0.995977	9	Tissue 3	FIGLA,TCF3,TCF4
WHRadjBMI	ADAMTS9	rs2371767	ADAMTS9	rs4616635	rs7433808	0.189912	0.817086	9	Tissue 3	HSF4,SMAD3		Adipocytes
Weight	AIF1	rs115963686	CSNK2B	rs114899308	rs145554793	0.324224	0.820463	31	Tissue 1,Tissue 2,Tissue 3	EGR1,EWSR1-FLI1,IRF1,PRDM1,ZNF263	IRF1	Adipocytes,Preadipocytes
Weight	AIF1	rs115963686	CSNK2B	rs114899308	rs114195058	0.324323	0.822271	31	Tissue 1,Tissue 2,Tissue 3	ATF4,ATF7,BATF3,Creb5,Crem,DBP,HLF,JDP2(var.2),JUND(var.2),Lhx3,NFIL3,PHOX2A,PROP1,Phox2b,TEF		Adipocytes,Preadipocytes
Weight	AIF1	rs115963686	CSNK2B	rs114899308	rs116665625	0.323133	0.815493	31	Tissue 1,Tissue 2,Tissue 3	TBP		Adipocytes,Preadipocytes
HDL cholesterol	ANGPTL8	rs4804154	ANGPTL8		rs12463177	0.117895	0.971939	11	Tissue 3			Adipocytes
Type 2 diabetes	AP3S2	rs2028299	ARPIN (C15orf38)	rs7174878	chr15:90371590	0.255729	0.986212	58	Tissue 1			Adipocytes,Preadipocytes
Type 2 diabetes	AP3S2	rs2028299	ARPIN (C15orf38)	rs7174878	rs4932143	0.255778	0.996875	58	Tissue 1,Tissue 3			Adipocytes,Preadipocytes
Type 2 diabetes	AP3S2	rs2028299	ARPIN (C15orf38)	rs7174878	rs986505	0.256473	0.977689	58	Tissue 1			Adipocytes,Preadipocytes
Triglycerides	APOE-TOMM40	rs439401	APOE	rs439401	rs439401	0.270558	-1	3	Tissue 1,Tissue 3	E2F6,EGR3,EGR4,EWSR1-FLI1,KLF16,KLF5,MZF1(var.2),NR2C2,RREB1,SP1,SP2,SP3,SP8,ZNF263,ZNF740		Adipocytes,Preadipocytes
Obesity	ATP2A1-SH2B1	rs7498665	ATXN2L,SH2B1	rs11863370,rs62037367	rs148099387	0.431306	0.997174	107	Tissue 1	NFIC::TLX1		Adipocytes
Obesity	ATP2A1-SH2B1	rs7498665	ATXN2L,SH2B1	rs11863370,rs62037367	rs11864750	0.429471	0.989334	107	Tissue 1,Tissue 2,Tissue 3	EGR1,RREB1,SP2,ZNF263		Adipocytes,Preadipocytes
Obesity	ATP2A1-SH2B1	rs7498665	ATXN2L,SH2B1	rs11863370,rs62037367	rs7187776	0.448715	0.933628	107	Tissue 1,Tissue 2,Tissue 3	SPI1,SPIB	SPI1	Adipocytes,Preadipocytes
Obesity	ATP2A1-SH2B1	rs7498665	ATXN2L,SH2B1	rs11863370,rs62037367	rs7198606	0.432001	1	107	Tissue 1,Tissue 2,Tissue 3	ZNF263		Adipocytes,Preadipocytes
Obesity	ATP2A1-SH2B1	rs7498665	ATXN2L,SH2B1	rs11863370,rs62037367	rs8055138	0.432001	1	107	Tissue 1	NR2C2,Nr2f6		Adipocytes,Preadipocytes
Coronary heart disease	ATP5G1-GIP-SNF8-UBE2Z	rs46522	CALCOCO2,UBE2Z	rs62075846,rs9904645	rs3510875	0.458089	0.994809	116	Tissue 1,Tissue 2,Tissue 3	Sox1		Adipocytes,Preadipocytes
Coronary heart disease	ATP5G1-GIP-SNF8-UBE2Z	rs46522	CALCOCO2,UBE2Z	rs62075846,rs9904645	rs2270574	0.457693	0.999201	116	Tissue 1,Tissue 2,Tissue 3			Adipocytes,Preadipocytes
Coronary heart disease	ATP5G1-GIP-SNF8-UBE2Z	rs46522	CALCOCO2,UBE2Z	rs62075846,rs9904645	rs61576918	0.458189	0.997205	116	Tissue 1,Tissue 2,Tissue 3	EHF,ELK3,ELK4,ETV4,ETV6,Gabpa		Adipocytes,Preadipocytes
Coronary heart disease	ATP5G1-GIP-SNF8-UBE2Z	rs46522	CALCOCO2,UBE2Z	rs62075846,rs9904645	rs9904645	0.456998	0.992018	116	Tissue 1,Tissue 2,Tissue 3	ZNF143		Adipocytes,Preadipocytes
Phospholipid	C11orf10	rs174538	TMEM258 (C11orf10)	rs108499	rs174538	0.336723	-1	6	Tissue 1,Tissue 3	Creb3l2,XBP1	Creb3l2	Adipocytes,Preadipocytes
Glycated hemoglobins	C1orf85-CCT3-TMEM79	rs6684514	CCT3,GLMP (C1orf85)	rs12022657,rs2273832	rs139949895	0.282412	0.984018	111	Tissue 1,Tissue 2,Tissue 3	HSF1,HSF2,HSF4		Adipocytes,Preadipocytes
Glycated hemoglobins	C1orf85-CCT3-TMEM79	rs6684514	CCT3,GLMP (C1orf85)	rs12022657,rs2273832	rs12132794	0.285537	0.999757	111	Tissue 1,Tissue 3	JUN(var.2),MAF::NFE2,Nr2e3		Adipocytes
Glycated hemoglobins	C1orf85-CCT3-TMEM79	rs6684514	CCT3,GLMP (C1orf85)	rs12022657,rs2273832	rs3806409	0.285339	0.998784	111	Tissue 1,Tissue 2,Tissue 3	EGR4,EWSR1-FLI1,GCM2,RARA::RXRA,RREB1,THAP1,ZNF263		Adipocytes,Preadipocytes
Coronary heart disease	CDKN2A-CDKN2B	rs1333048	CDKN2B	rs1333046	rs1333042	0.410178	0.948515	53	Tissue 1,Tissue 2,Tissue 3			Adipocytes,Preadipocytes
Coronary heart disease	CDKN2A-CDKN2B	rs1333048	CDKN2B	rs1333046	rs1537373	0.410078	0.948102	53	Tissue 1,Tissue 2,Tissue 3	GCM2		Adipocytes,Preadipocytes
Coronary heart disease	CDKN2A-CDKN2B	rs1333048	CDKN2B	rs1333046	rs2891168	0.422875	0.89792	53	Tissue 1			Adipocytes
HDL cholesterol	CETP	rs1532624	CETP	rs4784741	rs12720926	0.411864	0.989602	10	Tissue 2,Tissue 3			Adipocytes,Preadipocytes
Cardiac hypertrophy	COL17A1	rs1320448	OBFC1,RP11-541N10.3	rs79342925	rs111447985	0.05803	0.880233	57	Tissue 1,Tissue 2,Tissue 3	ELK1,ELK3,ELK4,ERF,ETS1,ETV1,ETV4,ETV5,FEV,FLI1,Gabpa,TFAP2A(var.3),TFAP2B(var.3),TFAP2C(var.3)	ETS1	Adipocytes,Preadipocytes
Waist-hip ratio	CPEB4	rs6861681	CPEB4	rs72812818	rs547833435	0.446087	0.893898	79	Tissue 1,Tissue 3	CTCF,EGR1,EGR3,SP2		Adipocytes,Preadipocytes
Waist-hip ratio	CPEB4	rs6861681	CPEB4	rs72812818	rs55946741	0.465331	0.999801	79	Tissue 1,Tissue 3			Adipocytes,Preadipocytes
Body mass index	DMXL2	rs3736485	CYP19A1	rs930920	rs2278989	0.47034	0.815551	194	Tissue 1			Adipocytes,Preadipocytes
Body mass index	DMXL2	rs3736485	CYP19A1	rs930920	rs2278990	0.47034	0.815551	194	Tissue 1	NFKB1,NFKB2		Adipocytes,Preadipocytes
Body mass index	DMXL2	rs3736485	CYP19A1	rs930920	rs7183479	0.463694	0.82174	194	Tissue 1			Adipocytes,Preadipocytes
Total Cholesterol	DOCK7-ANGPTL3	rs2131925	DOCK7	rs631106	rs631106	0.241444	0.997022	237	Tissue 1			Adipocytes,Preadipocytes
Metabolic traits	ETFDH	rs8396	ETFDH	rs17843929	rs2070629	0.232963	0.994457	22	Tissue 1,Tissue 2,Tissue 3			Adipocytes,Preadipocytes
Metabolic traits	ETFDH	rs8396	ETFDH	rs17843929	rs2070630	0.232963	0.994457	22	Tissue 1,Tissue 2,Tissue 3	TFAP2A(var.3),TFAP2C(var.3)		Adipocytes,Preadipocytes
Triglycerides	FADS1	rs174548	FADS1	rs174555	rs174561	0.395496	0.968415	48	Tissue 1,Tissue 2,Tissue 3	EGR3,NFKB1		Adipocytes,Preadipocytes
Adiponectin	GNL3	rs2590838	GNL3,NEK4	rs35212380,rs7612511	rs1108842	0.472473	1	21	Tissue 1,Tissue 2,Tissue 3			Adipocytes,Preadipocytes
Total Cholesterol	GPR146	rs1997243	GPR146	rs11764937	rs10252404	0.115316	0.807176	132	Tissue 1,Tissue 2,Tissue 3	EGR1,INSM1,KLF14,Klf12,NFKB1,PLAG1,TEAD1,ZNF263		Adipocytes,Preadipocytes
Total Cholesterol	GPR146	rs1997243	GPR146	rs11764937	rs113642700	0.132229	0.991799	132	Tissue 1,Tissue 2,Tissue 3			Adipocytes,Preadipocytes
Total Cholesterol	GPR146	rs1997243	GPR146	rs11764937	rs1997243	0.132179	-1	132	Tissue 3	EWSR1-FLI1,KLF5,MZF1(var.2),SP1,SP2,ZNF263		Adipocytes,Preadipocytes
Total Cholesterol	GPR146	rs1997243	GPR146	rs11764937	rs28522260	0.135899	0.959189	132	Tissue 1,Tissue 3	Nr1h3::Rxra		Adipocytes
Total Cholesterol	GPR146	rs1997243	GPR146	rs11764937	rs77760339	0.132279	0.999136	132	Tissue 1,Tissue 2,Tissue 3			Adipocytes,Preadipocytes
HDL cholesterol	GSK3B	rs6805251	GSK3B	rs334533	rs334558	0.368366	0.899155	61	Tissue 1,Tissue 2,Tissue 3	INSM1,NR2C2		Adipocytes,Preadipocytes
Body mass index	INO80E	rs4787491	HIRIP3,INO80E,TBX6,TMEM219,YPEL3	rs4788211,rs7204797,rs9928448,rs9972866	rs10871451	0.420792	0.891016	87	Tissue 1,Tissue 3	EOMES,Nr1h3::Rxra,Rarg(var.2)		Adipocytes,Preadipocytes
Body mass index	INO80E	rs4787491	HIRIP3,INO80E,TBX6,TMEM219,YPEL3	rs4788211,rs7204797,rs9928448,rs9972866	rs4318227	0.41975	0.894621	87	Tissue 1,Tissue 2,Tissue 3	NR2C2,NRF1		Adipocytes,Preadipocytes
Venous thromboembolism (gene x gene interaction)	intergenic	rs6695223	WDR63	rs10782538	rs6681402	0.0905168	0.996397	20	Tissue 1,Tissue 2,Tissue 3	Hoxc9,MEF2A,MEF2B		Adipocytes,Preadipocytes
Venous thromboembolism (gene x gene interaction)	intergenic	rs6695223	WDR63	rs10782538	rs6681619	0.0910624	0.989825	20	Tissue 1,Tissue 2,Tissue 3			Adipocytes,Preadipocytes
Fasting insulin-related traits (interaction with BMI)	IRS1	rs2943634	IRS1	rs1515098	rs2943646	0.375608	0.882662	107	Tissue 2	Dux
WHRadjBMI	JUND	rs12608504	JUND	rs7247222	rs7247222	0.347981	0.939994	19	Tissue 1,Tissue 2,Tissue 3	PAX1,PAX5,PAX9		Adipocytes,Preadipocytes
HIPadjBMI	KLHL31	rs7739232	KLHL31	rs113505085	rs76936629	0.0750918	0.991498	52	Tissue 1,Tissue 3			Adipocytes
HIPadjBMI	KLHL31	rs7739232	KLHL31	rs113505085	rs79823138	0.0750918	0.991498	52	Tissue 1			Adipocytes
HIPadjBMI	KLHL31	rs7739232	KLHL31	rs113505085	rs80271463	0.0756373	0.999291	52	Tissue 1			Adipocytes
Metabolic traits	LACTB	rs2652822	LACTB	rs2652822	rs2292038	0.478871	0.965617	16	Tissue 1,Tissue 2,Tissue 3	HIC2,MTF1,RARA::RXRA		Adipocytes,Preadipocytes
Metabolic traits	LACTB	rs2652822	LACTB	rs2652822	rs7170846	0.476143	0.976409	16	Tissue 1,Tissue 3	USF1		Adipocytes,Preadipocytes
HDL cholesterol	LCAT	rs2271293	GFOD2,NUTF2	rs6499143,rs7199443	rs1124324	0.169775	1	92	Tissue 1,Tissue 3	SOX21,ZBTB7A,ZBTB7B,ZBTB7C		Adipocytes,Preadipocytes
HDL cholesterol	LCAT	rs2271293	GFOD2,NUTF2	rs6499143,rs7199443	rs20549	0.200278	0.814092	92	Tissue 1,Tissue 2,Tissue 3			Adipocytes,Preadipocytes
HDL cholesterol	LCAT	rs2271293	GFOD2,NUTF2	rs6499143,rs7199443	rs7196789	0.193384	0.852952	92	Tissue 1,Tissue 2,Tissue 3	TFAP2A(var.3),TFAP2B(var.3),TFAP2C(var.3)		Adipocytes,Preadipocytes
HDL cholesterol	LCAT	rs2271293	GFOD2,NUTF2	rs6499143,rs7199443	rs7199443	0.193532	0.852139	92	Tissue 1,Tissue 2,Tissue 3	EWSR1-FLI1,NR2C2,Pparg::Rxra,ZNF263		Adipocytes,Preadipocytes
WHRadjBMI	LEKR1	rs17451107	TIPARP	rs10049090	rs13322435	0.315346	0.936043	16	Tissue 1,Tissue 2,Tissue 3	ZEB1		Adipocytes,Preadipocytes
WHRadjBMI	LEKR1	rs17451107	TIPARP	rs10049090	rs56406311	0.301359	0.999529	16	Tissue 1,Tissue 2,Tissue 3	NFIC::TLX1,Nr5a2,PLAG1,TFAP2A,TFAP2A(var.2),TFAP2B,TFAP2B(var.2),TFAP2C,TFAP2C(var.2)		Adipocytes,Preadipocytes
WHRadjBMI	LEKR1	rs17451107	TIPARP	rs10049090	rs9817452	0.301805	0.997412	16	Tissue 1,Tissue 2,Tissue 3	NFIC::TLX1,Nr5a2,TFAP2A,TFAP2A(var.2),TFAP2B,TFAP2B(var.2),TFAP2C,TFAP2C(var.2)		Adipocytes,Preadipocytes
WHRadjBMI	LEKR1	rs17451107	TIPARP	rs10049090	rs9854955	0.315296	0.936258	16	Tissue 1,Tissue 2,Tissue 3			Adipocytes,Preadipocytes
Coronary heart disease	LIPA	rs1412444	LIPA	rs1412445	rs1332328	0.402837	0.948118	8	Tissue 3	EGR2,EGR4,GCM1,GCM2,ZEB1		Adipocytes,Preadipocytes
Proinsulin	MADD	rs10501320	ACP2,FNBP4	rs10501320,rs11039149	rs11039149	0.179546	0.97985	7	Tissue 1,Tissue 2,Tissue 3	PLAG1,Pparg::Rxra		Adipocytes,Preadipocytes
Lipid metabolism phenotypes (VLDL-D)	MLXIPL	rs13247874	MLXIPL	rs35493868	rs55747707	0.157772	0.959112	33	Tissue 1,Tissue 2,Tissue 3			Adipocytes,Preadipocytes
Triglycerides	MLXIPL	rs3812316	BCL7B,TBL2	rs2240466,rs799166	rs13231516	0.116209	0.964795	55	Tissue 1,Tissue 3			Adipocytes
Triglycerides	MLXIPL	rs3812316	BCL7B,TBL2	rs2240466,rs799166	rs13233571	0.118143	0.984322	55	Tissue 1	MEIS2		Adipocytes,Preadipocytes
Triglycerides	MLXIPL	rs3812316	BCL7B,TBL2	rs2240466,rs799166	rs799165	0.117399	0.901648	55	Tissue 1	ELK3,ELK4,ERF,ERG,ETS1,ETV2,ETV6,FEV,FLI1,Gabpa
Type 2 diabetes	MPHOSPH9	rs1727313	C12orf65 (SPG55, COXPD7),CDK2AP1,SBNO1	rs11057206,rs1616131,rs28583837	rs7485502	0.223738	0.81857	215	Tissue 1	NRF1		Adipocytes,Preadipocytes
Triglycerides	MPP3	rs8077889	DUSP3,MPP3	rs2342310,rs55768269	rs2074143	0.243875	0.847199	97	Tissue 1			Adipocytes,Preadipocytes
Triglycerides	MPP3	rs8077889	DUSP3,MPP3	rs2342310,rs55768269	rs72836556	0.213917	0.985647	97	Tissue 1,Tissue 3	FOXA1,FOXC2,FOXF2,Foxa2,Foxj3,NFATC1,SOX8		Adipocytes,Preadipocytes
Triglycerides	MPP3	rs8077889	DUSP3,MPP3	rs2342310,rs55768269	rs746742	0.191896	0.808194	97	Tissue 1,Tissue 2,Tissue 3	EWSR1-FLI1,ZNF263
Triglycerides	MPP3	rs8077889	DUSP3,MPP3	rs2342310,rs55768269	rs9894873	0.213917	0.985647	97	Tissue 1,Tissue 3	NFATC1,NFATC2		Adipocytes,Preadipocytes
Triglycerides	MPP3	rs8077889	DUSP3,MPP3	rs2342310,rs55768269	rs9901676	0.215455	0.976618	97	Tissue 1,Tissue 3	FOXA1,FOXC2,FOXD1,FOXD2,FOXF2,FOXG1,FOXI1,FOXL1,FOXO3,FOXO4,FOXO6,FOXP3,Foxa2,Foxj2,Foxj3,Foxq1,SOX8		Adipocytes,Preadipocytes
Coronary heart disease	MRAS	rs2306374	MRAS	rs34905952	rs9848655	0.100833	0.998906	15	Tissue 1,Tissue 2,Tissue 3	HNF4G,MZF1(var.2),NR2C2,Nr2f6,PRDM1,Pparg::Rxra,RXRB,RXRG,Rxra,SP1,SP2,Sox3,ZNF263		Adipocytes,Preadipocytes
Metabolic traits	NAT8	rs13391552	ALMS1	rs6740766	rs4547554	0.180091	0.813533	180	Tissue 1,Tissue 2,Tissue 3	GCM1,Hic1		Adipocytes
Palmitoleic acid (16:1n-7)	NDUFB8-SCD-SEC31B-WNT8B-HIF1AN	rs11190604	HIF1AN,SEC31B	rs2489041,rs7071271	rs10883506	0.220067	0.894783	240	Tissue 1,Tissue 2,Tissue 3			Adipocytes,Preadipocytes
Palmitoleic acid (16:1n-7)	NDUFB8-SCD-SEC31B-WNT8B-HIF1AN	rs11190604	HIF1AN,SEC31B	rs2489041,rs7071271	rs11190599	0.220514	0.897046	240	Tissue 1,Tissue 2,Tissue 3			Adipocytes,Preadipocytes
Palmitoleic acid (16:1n-7)	NDUFB8-SCD-SEC31B-WNT8B-HIF1AN	rs11190604	HIF1AN,SEC31B	rs2489041,rs7071271	rs2295776	0.220514	0.897046	240	Tissue 1,Tissue 2,Tissue 3	Klf1,RREB1,SP3		Adipocytes,Preadipocytes
Palmitoleic acid (16:1n-7)	NDUFB8-SCD-SEC31B-WNT8B-HIF1AN	rs11190604	HIF1AN,SEC31B	rs2489041,rs7071271	rs2495758	0.20246	0.999079	240	Tissue 1,Tissue 3			Adipocytes,Preadipocytes
Waist-hip ratio	NISCH-STAB1	rs6784615	NISCH	rs728408	rs3065763	0.0309493	0.937835	99	Tissue 1,Tissue 2,Tissue 3
Waist-hip ratio	NISCH-STAB1	rs6784615	NISCH	rs728408	rs13065677	0.0306517	0.885413	99	Tissue 1,Tissue 2,Tissue 3			Adipocytes,Preadipocytes
Waist-hip ratio	NISCH-STAB1	rs6784615	NISCH	rs728408	rs758800	0.0310485	0.934718	99	Tissue 3	GATA1::TAL1
Waist-hip ratio	NISCH-STAB1	rs6784615	NISCH	rs728408	rs929529	0.0309493	0.937835	99	Tissue 3	ZNF263
WHRadjBMI	NKX3-6	rs7830933	STC1	rs6983481	rs11986562	0.196607	0.910969	37	Tissue 1,Tissue 3			Adipocytes,Preadipocytes
WHRadjBMI	NKX3-6	rs7830933	STC1	rs6983481	rs6983481	0.196607	0.910969	37	Tissue 1,Tissue 3			Adipocytes,Preadipocytes
HDL cholesterol	NR0B2-PIGV	rs12748152	ARID1A,PIGV	rs34217609,rs6656815	rs11538549	0.0864498	0.88805	158	Tissue 1,Tissue 2,Tissue 3	NR2C2,REST,ZIC3		Adipocytes,Preadipocytes
HDL cholesterol	NR0B2-PIGV	rs12748152	ARID1A,PIGV	rs34217609,rs6656815	rs11555809	0.0870945	0.904682	158	Tissue 1,Tissue 2,Tissue 3			Adipocytes,Preadipocytes
HDL cholesterol	NR0B2-PIGV	rs12748152	ARID1A,PIGV	rs34217609,rs6656815	rs12737946	0.0856562	1	158	Tissue 1,Tissue 2,Tissue 3	PLAG1,RUNX1		Adipocytes,Preadipocytes
HDL cholesterol	NR0B2-PIGV	rs12748152	ARID1A,PIGV	rs34217609,rs6656815	rs12738345	0.0856562	1	158	Tissue 1,Tissue 2,Tissue 3	REST,ZBTB33		Adipocytes,Preadipocytes
HDL cholesterol	NR0B2-PIGV	rs12748152	ARID1A,PIGV	rs34217609,rs6656815	rs12742115	0.0856562	1	158	Tissue 1,Tissue 2,Tissue 3	SOX8		Adipocytes,Preadipocytes
HDL cholesterol	NR0B2-PIGV	rs12748152	ARID1A,PIGV	rs34217609,rs6656815	rs12760759	0.085805	0.995576	158	Tissue 1,Tissue 2			Adipocytes
HDL cholesterol	NR0B2-PIGV	rs12748152	ARID1A,PIGV	rs34217609,rs6656815	rs17162387	0.0864498	0.88805	158	Tissue 1	ZNF410		Adipocytes
HDL cholesterol	NR0B2-PIGV	rs12748152	ARID1A,PIGV	rs34217609,rs6656815	rs35108146	0.0867473	0.884653	158	Tissue 1			Adipocytes,Preadipocytes
HDL cholesterol	NR0B2-PIGV	rs12748152	ARID1A,PIGV	rs34217609,rs6656815	rs71636780	0.0859538	0.996213	158	Tissue 1,Tissue 2,Tissue 3	HES5,HES7,NRF1,Zfx		Adipocytes,Preadipocytes
HDL cholesterol	NR0B2-PIGV	rs12748152	ARID1A,PIGV	rs34217609,rs6656815	rs71640337	0.102024	0.824543	158	Tissue 1			Adipocytes,Preadipocytes
Metabolic traits	OPLAH	rs6558295	CYC1	rs7836836	chr8:145159708	0.0862018	0.833673	114	Tissue 1,Tissue 2	Klf12		Adipocytes,Preadipocytes
Metabolic traits	OPLAH	rs6558295	CYC1	rs7836836	rs11136255	0.0800516	0.903764	114	Tissue 1,Tissue 2,Tissue 3			Adipocytes,Preadipocytes
Metabolic traits	OPLAH	rs6558295	CYC1	rs7836836	rs11541475	0.0787124	0.920478	114	Tissue 1	Tcfl5		Adipocytes,Preadipocytes
Metabolic traits	OPLAH	rs6558295	CYC1	rs7836836	rs13255347	0.0805972	0.897114	114	Tissue 1	CTCF,GCM1,GCM2,NR2C2,THAP1		Adipocytes,Preadipocytes
Metabolic traits	OPLAH	rs6558295	CYC1	rs7836836	rs13256214	0.073951	0.984808	114	Tissue 1,Tissue 2,Tissue 3	Bach1::Mafk,GLIS1		Adipocytes,Preadipocytes
Metabolic traits	OPLAH	rs6558295	CYC1	rs7836836	rs6984764	0.084813	0.848611	114	Tissue 1,Tissue 2,Tissue 3	NRF1,REST		Adipocytes,Preadipocytes
Metabolic traits	OPLAH	rs6558295	CYC1	rs7836836	rs75361772	0.073703	0.988386	114	Tissue 1,Tissue 2,Tissue 3	GLIS1		Adipocytes,Preadipocytes
HDL cholesterol	PDE3A	rs7134375	PDE3A	rs7134375	rs7134375	0.397332	-1	3	Tissue 1	ELK1,ELK3,ERF,ERG,ETS1,ETV1,ETV3,ETV4,ETV5,FEV,FLI1
Lipoprotein-associated phospholipase A2 activity and mass	PLA2G7	rs7756935	PLA2G7	rs3757241	rs7767605	0.246503	0.976309	25	Tissue 3			Adipocytes
Intracranial aneurysm	PLCL1-BOLL	rs700651	SF3B1	rs2564383	rs1116734	0.427686	0.859539	296	Tissue 1,Tissue 2,Tissue 3			Adipocytes,Preadipocytes
Intracranial aneurysm	PLCL1-BOLL	rs700651	SF3B1	rs2564383	rs4850812	0.3889	0.957302	296	Tissue 1	Hic1,NFIA,NFIX,Sox1		Adipocytes
HDL cholesterol	PMVK-HDGF	rs12145743	RRNAD1	rs3806415	rs3806415	0.325017	0.969816	18	Tissue 1,Tissue 2,Tissue 3			Adipocytes,Preadipocytes
HDL cholesterol	PMVK-HDGF	rs12145743	RRNAD1	rs3806415	rs4501833	0.323777	0.99932	18	Tissue 1,Tissue 3	RFX2,RFX4		Adipocytes,Preadipocytes
Total Cholesterol	PXK	rs13315871	PXK	rs35557787	rs77825960	0.102916	0.914103	184	Tissue 1,Tissue 2,Tissue 3			Adipocytes,Preadipocytes
Total Cholesterol	PXK	rs13315871	PXK	rs35557787	rs78578590	0.103462	0.919208	184	Tissue 1,Tissue 2,Tissue 3	EGR1,EGR4,Klf4,SP1,SP2,SP4,ZNF740		Adipocytes,Preadipocytes
Total Cholesterol	PXK	rs13315871	PXK	rs35557787	rs78946071	0.0993453	0.96196	184	Tissue 1,Tissue 2,Tissue 3	GLIS2,GLIS3		Adipocytes,Preadipocytes
Total Cholesterol	PXK	rs13315871	PXK	rs35557787	rs79813245	0.0972622	0.979402	184	Tissue 1,Tissue 2,Tissue 3	CTCF,EGR1,SP1,SP2,TFAP2A(var.2)		Adipocytes,Preadipocytes
HDL cholesterol	RBM5	rs2013208	RBM6	rs11130233	rs2526754	0.447178	0.995191	96	Tissue 1	GLIS3		Adipocytes,Preadipocytes
HDL cholesterol	RBM5	rs2013208	RBM6	rs11130233	rs6772095	0.450699	0.972284	96	Tissue 1			Adipocytes,Preadipocytes
Metabolic traits,Phospholipid	SCD	rs603424	SCD	rs603424	rs603424	0.11611	-1	1	Tissue 1,Tissue 2,Tissue 3	TBX2,TBX20,TBX21		Adipocytes
Type 2 diabetes	SDHAF4 (C6orf57)	rs1048886	SDHAF4 (C6orf57)	rs6901232	rs56377123	0.248041	0.932155	303	Tissue 1,Tissue 2,Tissue 3	PAX7		Adipocytes
Type 2 diabetes	SDHAF4 (C6orf57)	rs1048886	SDHAF4 (C6orf57)	rs6901232	rs112809632	0.224581	0.877106	303	Tissue 2	EGR1,NR2C2,NRF1,SP2,SP8		Adipocytes,Preadipocytes
Type 2 diabetes	SDHAF4 (C6orf57)	rs1048886	SDHAF4 (C6orf57)	rs6901232	rs4283855	0.248041	0.932155	303	Tissue 1			Adipocytes
Type 2 diabetes	SDHAF4 (C6orf57)	rs1048886	SDHAF4 (C6orf57)	rs6901232	rs55968813	0.224531	0.920498	303	Tissue 1			Adipocytes
WHRadjBMI	SNX10	rs1534696	CBX3,SNX10	rs1534696	rs1534696	0.464041	-1	1	Tissue 1	MEF2C
Intracranial aneurysm	STARD13	rs9315204	KL,STARD13	rs1998728,rs614691	rs1980781	0.343914	0.999121	22	Tissue 1,Tissue 2,Tissue 3	HNF4G,Nr2f6(var.2),RORA,RORA(var.2),Rarb,Rarg		Adipocytes,Preadipocytes
HDL cholesterol	STARD3	rs11869286	PGAP3,STARD3	rs11869286,rs2517951	rs2271308	0.27408	0.82166	62	Tissue 3
Total Cholesterol	TMEM57	rs10903129	RHCE,TMEM50A,TMEM57	rs3093578,rs35343405,rs78809829	rs9438904	0.462553	0.972424	179	Tissue 1,Tissue 2,Tissue 3	Bach1::Mafk,CREB3L1,XBP1		Adipocytes,Preadipocytes
Total Cholesterol	TOM1	rs138777	HMGXB4	rs9306298	rs138728	0.343468	0.88858	130	Tissue 1,Tissue 2,Tissue 3	EWSR1-FLI1,ZNF263		Adipocytes,Preadipocytes
Total Cholesterol	TOM1	rs138777	HMGXB4	rs9306298	rs138733	0.336227	0.860215	130	Tissue 3			Adipocytes,Preadipocytes
Total Cholesterol	TOM1	rs138777	HMGXB4	rs9306298	rs3215443	0.369408	0.992555	130	Tissue 1,Tissue 2,Tissue 3	KLF16,SP4,SP8		Adipocytes,Preadipocytes
Total Cholesterol	TOM1	rs138777	HMGXB4	rs9306298	rs4461	0.368565	0.991492	130	Tissue 1,Tissue 2,Tissue 3			Adipocytes,Preadipocytes
Total Cholesterol	TOM1	rs138777	HMGXB4	rs9306298	rs4463	0.372384	0.979502	130	Tissue 3	SP1,SP2		Adipocytes,Preadipocytes
Total Cholesterol	TOM1	rs138777	HMGXB4	rs9306298	rs5755674	0.330771	0.835501	130	Tissue 1,Tissue 2,Tissue 3	Rfx1		Adipocytes,Preadipocytes
HDL cholesterol	UBE2L3	rs181362	UBE2L3,YDJC	rs11089620,rs12158299	rs3747093	0.341335	0.831789	91	Tissue 1,Tissue 2,Tissue 3	SP4,Zfx		Adipocytes,Preadipocytes
Body mass index	USP37	rs492400	PLCD4,RQCD1,ZNF142	rs4674320,rs62182125,rs832810	rs2241527	0.398968	0.893145	262	Tissue 1			Adipocytes,Preadipocytes
Body mass index	USP37	rs492400	PLCD4,RQCD1,ZNF142	rs4674320,rs62182125,rs832810	rs500317	0.424958	0.994524	262	Tissue 1,Tissue 2,Tissue 3	GLIS3,ZBTB33		Adipocytes,Preadipocytes
Body mass index	USP37	rs492400	PLCD4,RQCD1,ZNF142	rs4674320,rs62182125,rs832810	rs500422	0.432546	0.966107	262	Tissue 1,Tissue 2,Tissue 3	IRF8,Spz1		Adipocytes,Preadipocytes
Body mass index	USP37	rs492400	PLCD4,RQCD1,ZNF142	rs4674320,rs62182125,rs832810	rs524012	0.427487	0.984262	262	Tissue 1,Tissue 2,Tissue 3	E2F4,E2F6,E2F7,E2F8,EGR1,EGR2,EGR3,EGR4,SP1,SP2,ZNF263		Adipocytes,Preadipocytes
Body mass index	USP37	rs492400	PLCD4,RQCD1,ZNF142	rs4674320,rs62182125,rs832810	rs524902	0.424958	0.990472	262	Tissue 1,Tissue 2,Tissue 3	HNF4G,Hnf4a,KLF14,KLF16,NR1H2::RXRA,NR2C2,Nr2f6,Nr2f6(var.2),Pparg::Rxra,RXRB,RXRG,Rxra,SP3,SP4,SP8		Adipocytes,Preadipocytes
Body mass index	USP37	rs492400	PLCD4,RQCD1,ZNF142	rs4674320,rs62182125,rs832810	rs526897	0.398919	0.893358	262	Tissue 1,Tissue 2,Tissue 3	FOXP1,NFATC1,NFATC3,POU6F2,SRY,Sox6		Adipocytes,Preadipocytes
Coronary heart disease	WDR12	rs6725887	ICA1L	rs72928613	rs145741252	0.117697	0.910861	286	Tissue 1,Tissue 2	NRF1,Tcfl5		Adipocytes,Preadipocytes
Coronary heart disease	WDR12	rs6725887	ICA1L	rs72928613	rs144505847	0.1111	0.990467	286	Tissue 1,Tissue 2,Tissue 3			Adipocytes,Preadipocytes
Coronary heart disease	WDR12	rs6725887	ICA1L	rs72928613	rs149846585	0.11358	0.966107	286	Tissue 1,Tissue 2	SP2,SP8,TFAP2A(var.2),TFAP2B		Adipocytes,Preadipocytes
Coronary heart disease	WDR12	rs6725887	ICA1L	rs72928613	rs72932770	0.11115	0.990971	286	Tissue 1	MEF2A,TBP		Adipocytes

## Sheet: S8-Footprinting
Table S8: Footprinting of 35 transcription factors
Transcription Factor	JASPAR motif ID	Aggregate footprint in adipose Tissue samples	Cardiometabolic GWAS variants overlapping aggregate footprint in adipose Tissue	Number of footprints in Tissue 1	mTPR/fTPR Tissue 1	Number of footprints in Tissue 2	mTPR/fTPR Tissue 2	Number of footprints in Tissue 3	mTPR/fTPR Tissue 3
CEBPA	MA0102.3	1,2,3		10010	0.788462	7074	0.527273	9343	0.872549
CEBPB	MA0466.2
CEBPD	MA0826.1
CREB3I2	MA0608.1	1,2,3	rs174538, rs10495712	3972	0.90099	2799	0.696078	3889	0.940594
CTCF	MA0139.1
EBF1	MA0154.3
ELK3	MA0759.1
ETS1	MA0098.3	2	rs648651			5535	0.990099
FLI1	MA0475.2
FOXO1	MA0480.1	1,2,3		8609	0.72549	5522	0.509259	7622	0.861386
IRF1	MA0050.2	1,3	rs78085924, rs1402419, rs11097198	65530	0.09375			48881	0.0930233
MEF2D	MA0773.1	1,2,3		10321	0.347826	3547	0.365217	6785	0.419643
NFIA	MA0670.1	1,2,3		10166	0.542056	7200	0.415929	9085	0.718447
NR1H2::RXRA	MA0115.1
NR1H3::RXRA	MA0494.1
NR3C1	MA0113.3
PBX1	MA0070.1	1,2	rs12454712	1694	0.930693	1112	0.95098
PPARG::RXRA	MA0065.2
PPARG	MA0066.1
RARA::RXRA	MA0159.1
RARA_v1	MA0729.1
RARA_v2	MA0730.1
RFX2	MA0600.2
RREB1	MA0073.1
RUNX1	MA0002.2
RXRA::VDR	MA0074.1
RXRA	MA0512.1
SMAD2::SMAD3::SMAD4	MA0513.1
SMAD3	MA0795.1
SPI1	MA0080.4	1,2,3	rs7187776, rs1401419	10833	0.625	6171	0.381818	7982	0.72549
SPIB	MA0081.1
STAT3	MA0144.2	1,2,3	rs11097198	16627	0.504673	13479	0.359649	13079	0.699029
STAT5A::STAT5B	MA0519.1	1,2,3	rs11097198, rs6689393, rs7178051	11542	0.699029	8490	0.46789	9997	0.831683
TCF7L2	MA0523.1	1,2,3		11090	0.513514	5200	0.460177	7300	0.651376
ZEB1	MA0103.2

## Sheet: S9-Allelic Imbalance
Table S9: Allelic imbalance in ATAC-seq peaks
Sample	Number of peaks	Heterozygous Sites	Heterozygous sites overlapping ATAC signala	Imbalanced (p<0.05)
Tissue 1	58279	1894559	6461	189
Tissue 2	29409	1890071	3631	105
Tissue 3	49631	1885394	3836	103
Sites in at least 2 samples	N/A	1451379	2267	10
Sites in all 3 samples	N/A	269858	318	0
Required at least 10 total reads and >= 1 read per allele
p-values were generated using a two-tailed beta-binomial test

## Sheet: S10-AI at GWAS-eQTL variants
Table S10: Variants at GWAS-eQTL colocalized loci with allelic imbalance in ATAC-seq reads
			Tissue 1			Tissue 3
ATAC variant	MAF	Allelesa	Allele 1 count	Allele 2 count	P value	Allele 1 count	Allele 2 count	P value	GWAS Trait	eQTL Gene(s)	eQTL betaa	Adipose Nuclei Chromatin State	Transcription Factor Motifs
rs7187776	0.44861	A/G	25	3	0.00229043	homozygous		N/A	Obesity	SH2B1, ATXN2L	0.40, 0.34	Promoter	SPI1, SPIB
rs9854955	0.31656	G/A	15	5	0.05044	14	3	0.0163104	Obesity	TIPARP	0.41	Enhancer
rs13322435	0.31688	G/A	18	1	0.00031339	15	3	0.0107304	Obesity	TIPARP	0.41	Enhancer	ZEB1
rs56406311	0.30148	T/C	12	3	0.0392437	homozygous		N/A	Obesity	TIPARP	0.41	Enhancer	NFIC::TLX1, NR5A2, PLAG1, TFAP2A, TFAP2B, TFAP2C
rs9817452	0.30144	T/G	14	4	0.0380047	homozygous		N/A	Obesity	TIPARP	0.41	Enhancer	NFIC::TLX1, NR5A2, TFAP2A, TFAP2B, TFAP2C
rs73597582	0.146662	A/G	9	1	0.0221362	homozygous		N/A	HDL cholesterol	GFOD, NUTF2	-0.34, -0.30	Flanking Bivalent TSS/Enhancer
No significant allelic imbalances were identified in Tissue sample 2
Required at least 10 total reads and >= 1 read per allele
aAlleles: effect allele/non-effect allele. Effect allele for ATAC-seq is the allele with greater ATAC-seq reads.

[truncated: 2 more sheets: S11-All ATAC samples, S12-Primers & EMSA probes]
